# Supplementary material for: Biomimetic macroscopic mesocrystalline films produced by oriented assembly of nanorods under magnetic field
Source: Royal Society of Chemistry journal article supplement (doi:10.1039/c8nr07853j), 2018-01-01
Supplement: c8nr07853j1.pdf [file c8nr07853j1.pdf]

## Supporting information

### Biomimetic Macroscopic Mesocrystalline Films Produced by Oriented Assembly of Nanorods under Magnetic Field

Mihiro Takasaki,<sup>1</sup> Tohru S. Suzuki,<sup>2</sup> Yuya Oaki,<sup>1</sup> and Hiroaki Imai<sup>1\*</sup>

<sup>1</sup>Department of Applied Chemistry, Faculty of Science and Technology, Keio University, 3-14-1 Hiyoshi, Kohoku-ku, Yokohama 223-8522, Japan

<sup>2</sup>National Institute for Materials Science, 1-2-1 Sengen, Tsukuba, Ibaraki 305-0047, Japan

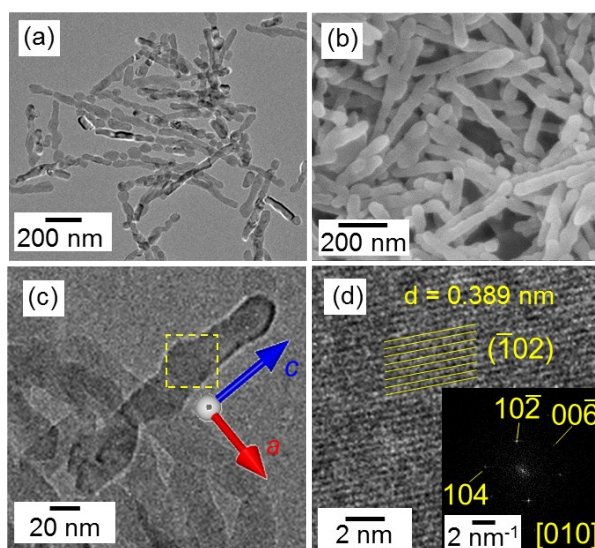

Fig. S1 TEM (a, c), SEM (b), and HRTEM (d) images with an FFT pattern of nanorods in an aqueous dispersion. Reproduced from Ref. 35 with permission.

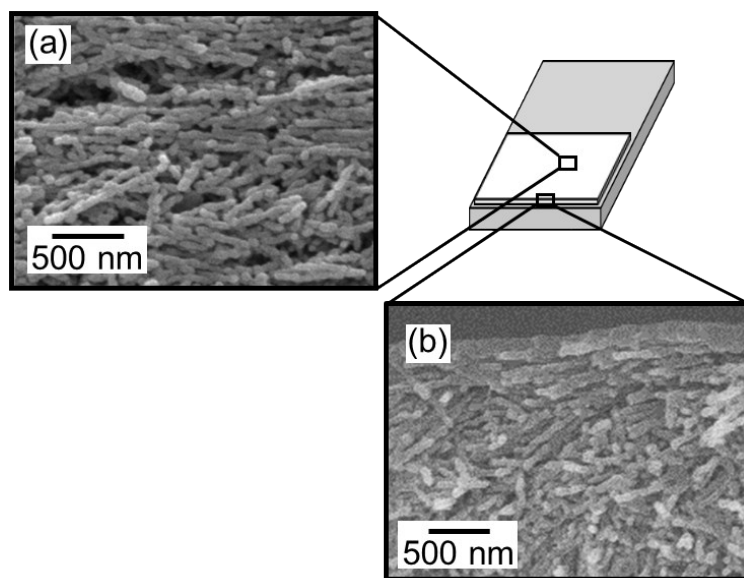

Fig. S2 Schematic illustration and SEM images of a film consisting of calcite nanorods on a Si substrate formed by an evaporation-driven self-assembly method without a magnetic field. (a) overview, (b) cross-shot
